# Supplementary material for: Prognostic Significance of the C-Reactive Protein to Albumin Ratio for Mortality in Critically Ill Adults: A Systematic Review and Meta-analysis Across Heterogeneous ICU Populations
Source: Research Square preprint supplement (doi:10.21203/rs.3.rs-8758904/v1), 2026-02-11
Supplement: Supplementary file 1 [file bc778a223158c7d8f52eb7d1.docx]

**Supplementary Material**

**Appendix 1 — PRISMA 2020 Checklist**

The Preferred Reporting Items for Systematic Reviews and Meta-Analyses (PRISMA) 2020 checklist was used to guide the conduct and reporting of this systematic review and meta-analysis. All checklist items were fully addressed, including eligibility criteria, information sources, search strategy, study selection, data extraction, risk of bias assessment, synthesis methods, reporting bias assessment, and certainty of evidence.

**Appendix 2 — PRISMA 2020 Flow Diagram (Text Description)**

A total of 936 records were identified through database searching. After removal of duplicates, titles and abstracts were screened for relevance. Sixty full-text articles were assessed for eligibility. Of these, 49 articles were excluded for predefined reasons. Eleven studies met inclusion criteria and were included in the final qualitative and quantitative synthesis. One study reported both odds ratios and hazard ratios and was included in both analyses.

**Appendix 3 — GRADE Summary of Findings**

| **Outcome** | **No. of studies** | **Study design** | **Certainty of evidence** |
| --- | --- | --- | --- |
| Mortality (OR-based analysis) | 6 | Observational | Low |
| Mortality (HR-based analysis) | 6 | Observational | Low |

The certainty of evidence was downgraded due to the observational design of included studies, inconsistency, and imprecision.

**Appendix 5 — Newcastle–Ottawa Scale (NOS) Quality Assessment**

| **Study** | **Selection** | **Comparability** | **Outcome** | **Total (/9)** |
| --- | --- | --- | --- | --- |
| Akpinar et al., 2020 | 4 | 2 | 3 | 9 |
| Bender et al., 2021 | 4 | 2 | 3 | 9 |
| Cacciola et al., 2022 | 3 | 2 | 3 | 8 |
| Chen et al., 2021 | 3 | 2 | 2 | 7 |
| Huang et al., 2020 | 3 | 1 | 2 | 6 |
| Kim et al., 2023 | 4 | 2 | 2 | 8 |
| Li et al., 2022 | 3 | 2 | 2 | 7 |
| Martinez et al., 2021 | 3 | 1 | 3 | 7 |
| Nguyen et al., 2022 | 4 | 2 | 3 | 9 |
| Rossi et al., 2020 | 3 | 1 | 2 | 6 |
| Zhang et al., 2023 | 4 | 2 | 3 | 9 |

**Appendix 6 — Sensitivity Analyses**

Sensitivity analyses were performed to assess the robustness of the pooled estimates. These included leave-one-out analyses, restriction to high-quality studies (Newcastle–Ottawa Scale ≥8), exclusion of small studies, and exclusion of the study reporting both odds ratios and hazard ratios. Across all scenarios, the pooled effect sizes remained consistent in magnitude and direction, with overlapping confidence intervals. No single study exerted undue influence on the overall results.

**HR-based meta-analysis**

| **Analysis** | **No. of studies** | **Pooled HR (95% CI)** | **I² (%)** |
| --- | --- | --- | --- |
| Primary analysis | 6 | 1.78 (1.32–2.39) | 62 |
| Leave-one-out (range) | 5 | 1.63–1.92 | 58–69 |
| High-quality studies only | 4 | 1.74 (1.29–2.35) | 60 |
| Excluding small studies | 4 | 1.71 (1.26–2.33) | 57 |
| Excluding dual OR/HR study | 5 | 1.76 (1.31–2.36) | 61 |

**OR-based meta-analysis**

| **Analysis** | **No. of studies** | **Pooled OR (95% CI)** | **I² (%)** |
| --- | --- | --- | --- |
| Primary analysis | 6 | 2.41 (1.72–3.37) | 68 |
| Leave-one-out (range) | 5 | 2.19–2.56 | 61–72 |
| High-quality studies only | 4 | 2.33 (1.61–3.36) | 64 |
| Excluding small studies | 4 | 2.28 (1.55–3.35) | 59 |
| Excluding dual OR/HR study | 5 | 2.37 (1.69–3.32) | 66 |

**Appendix 7 — Meta-regression Analyses**

| **Moderator** | **Coefficient (β)** | **Standard Error** | **p-value** |
| --- | --- | --- | --- |
| Mean age | 0.06 | 0.09 | 0.51 |
| Male proportion | 0.01 | 0.02 | 0.63 |
| ICU population type | 0.18 | 0.27 | 0.49 |
| CAR cut-off value | 0.11 | 0.15 | 0.47 |
| Study mortality rate | 0.02 | 0.03 | 0.44 |
| Publication year | −0.04 | 0.06 | 0.55 |

No statistically significant moderators were identified.
